# Supplementary figures and images for: TBK1 posphorylation activates LIR-dependent degradation of the inflammation repressor TNIP1
Source: PubMed Central journal article supplement — J Cell Biol. 2022 Dec 27;222(2):e202108144. doi: 10.1083/jcb.202108144 (PMC9797988; doi:10.1083/jcb.202108144), 2022-12-27

# Source data Fig1D

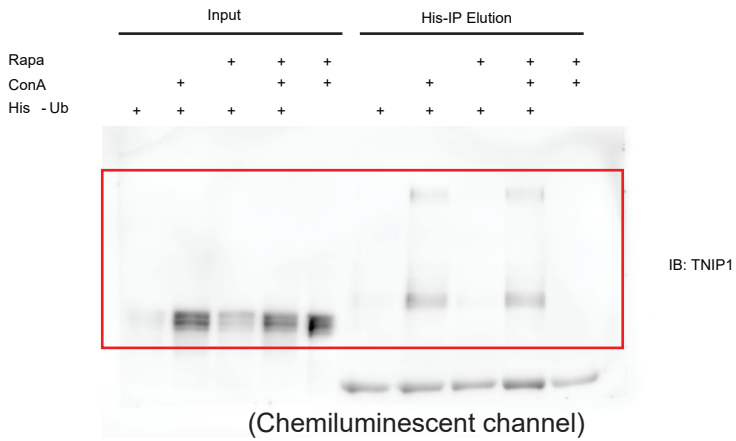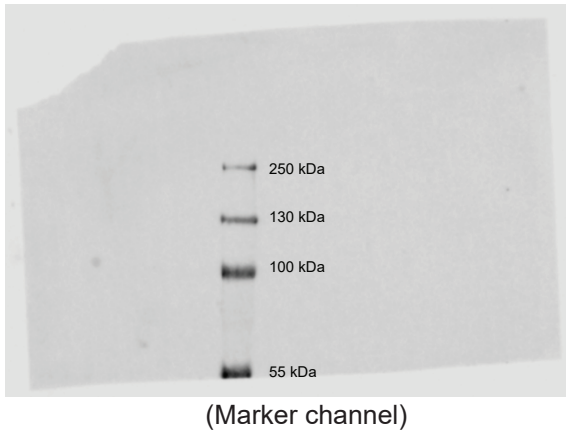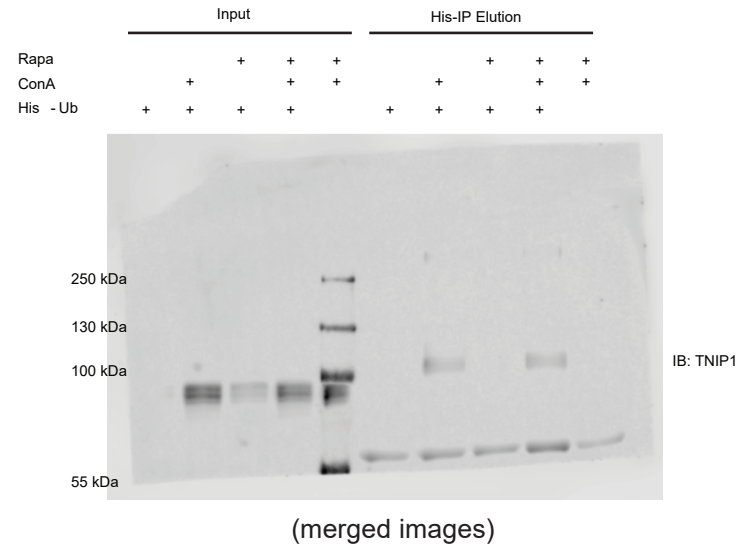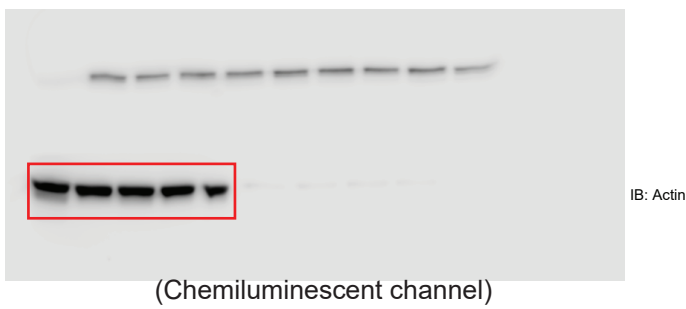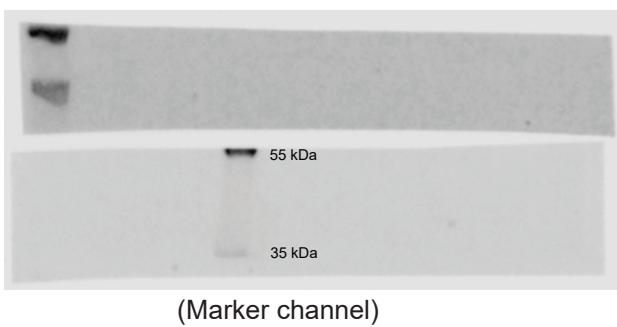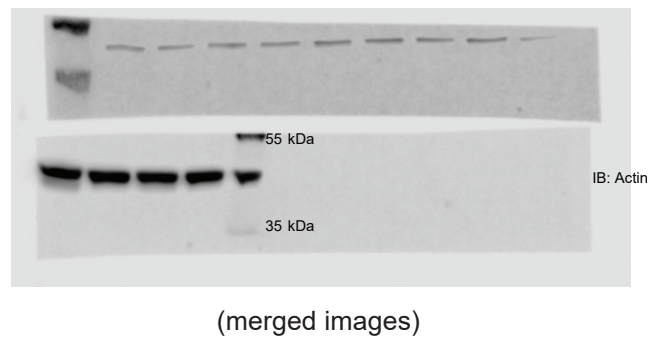

Biological replicate of Fig. 1D with MW marker in separate lane

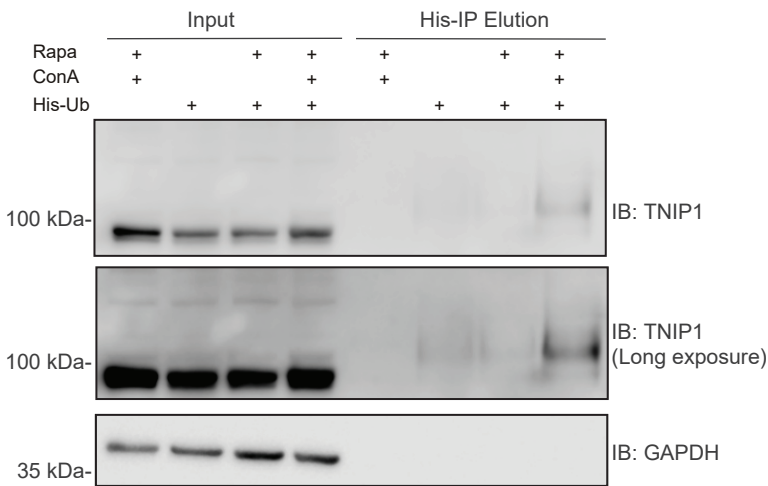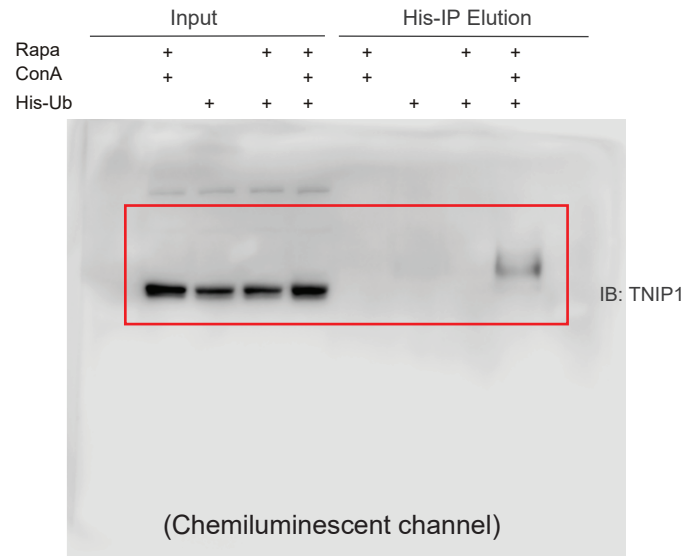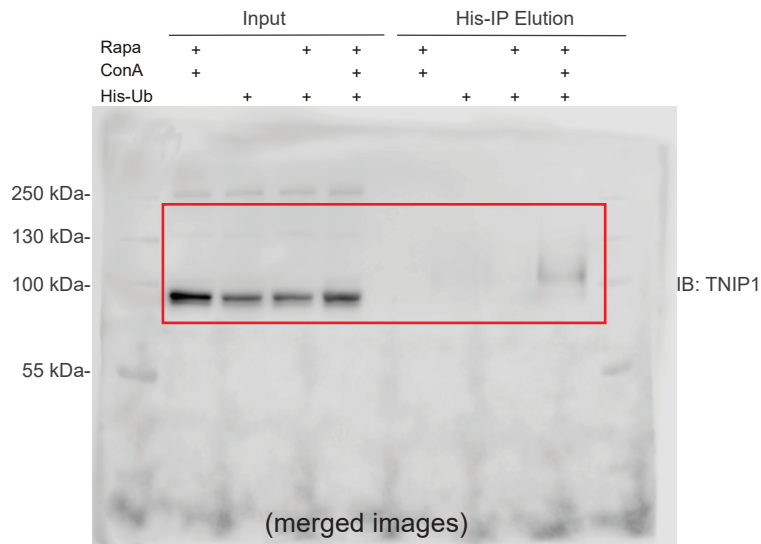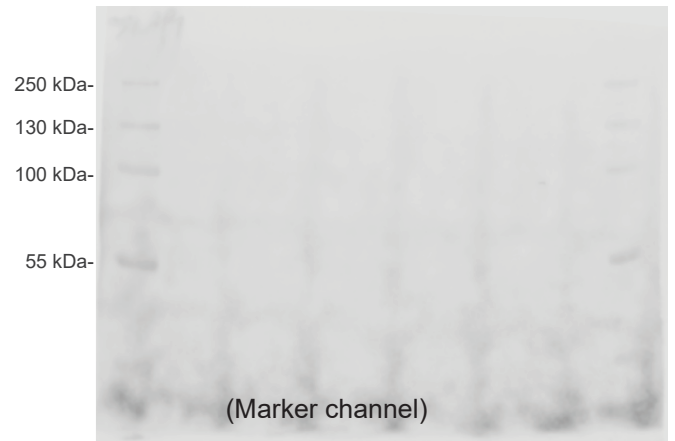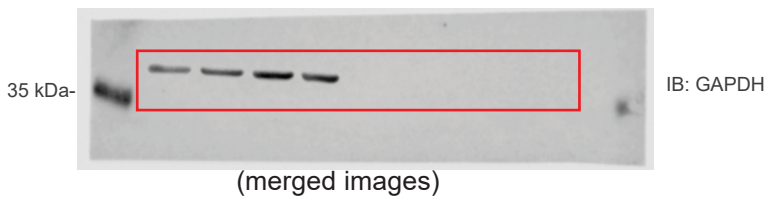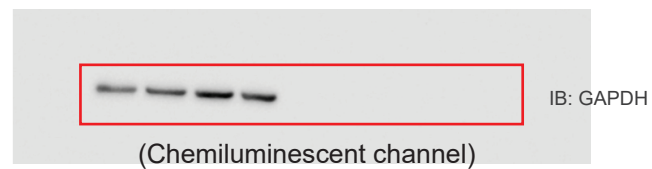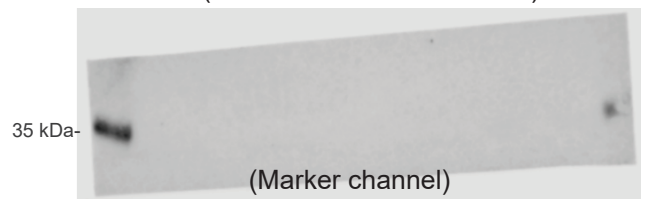

Supplement: JCB_202108144_SourceDataF1.pdf [file JCB_202108144_SourceDataF1.pdf]

Source data Fig2A

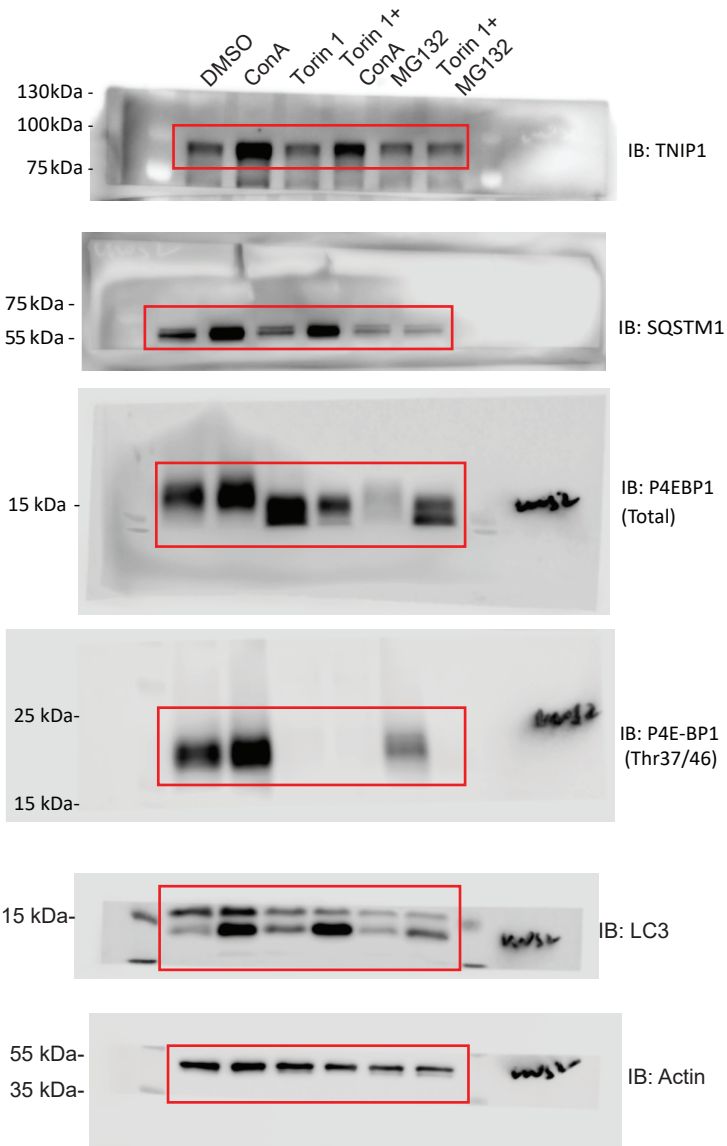

Supplement: JCB_202108144_SourceDataF2.pdf [file JCB_202108144_SourceDataF2.pdf]

Fig3C

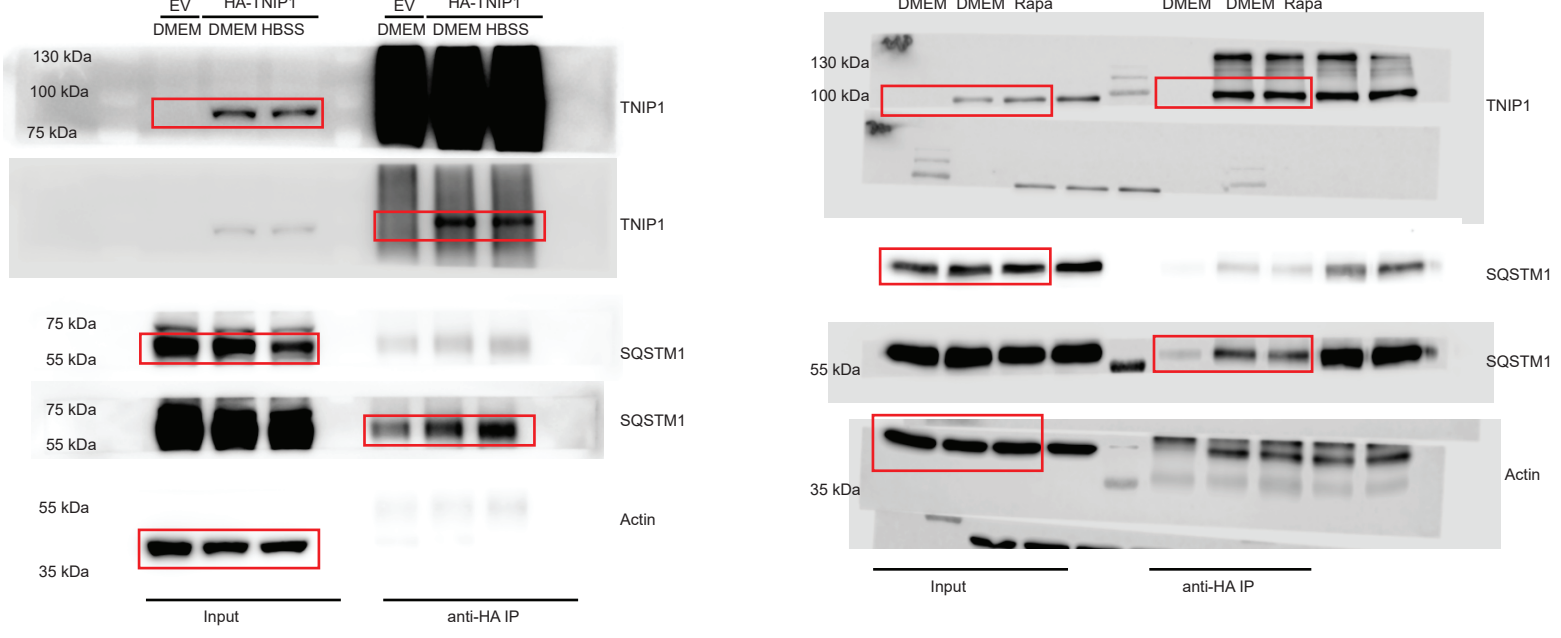

Fig3D

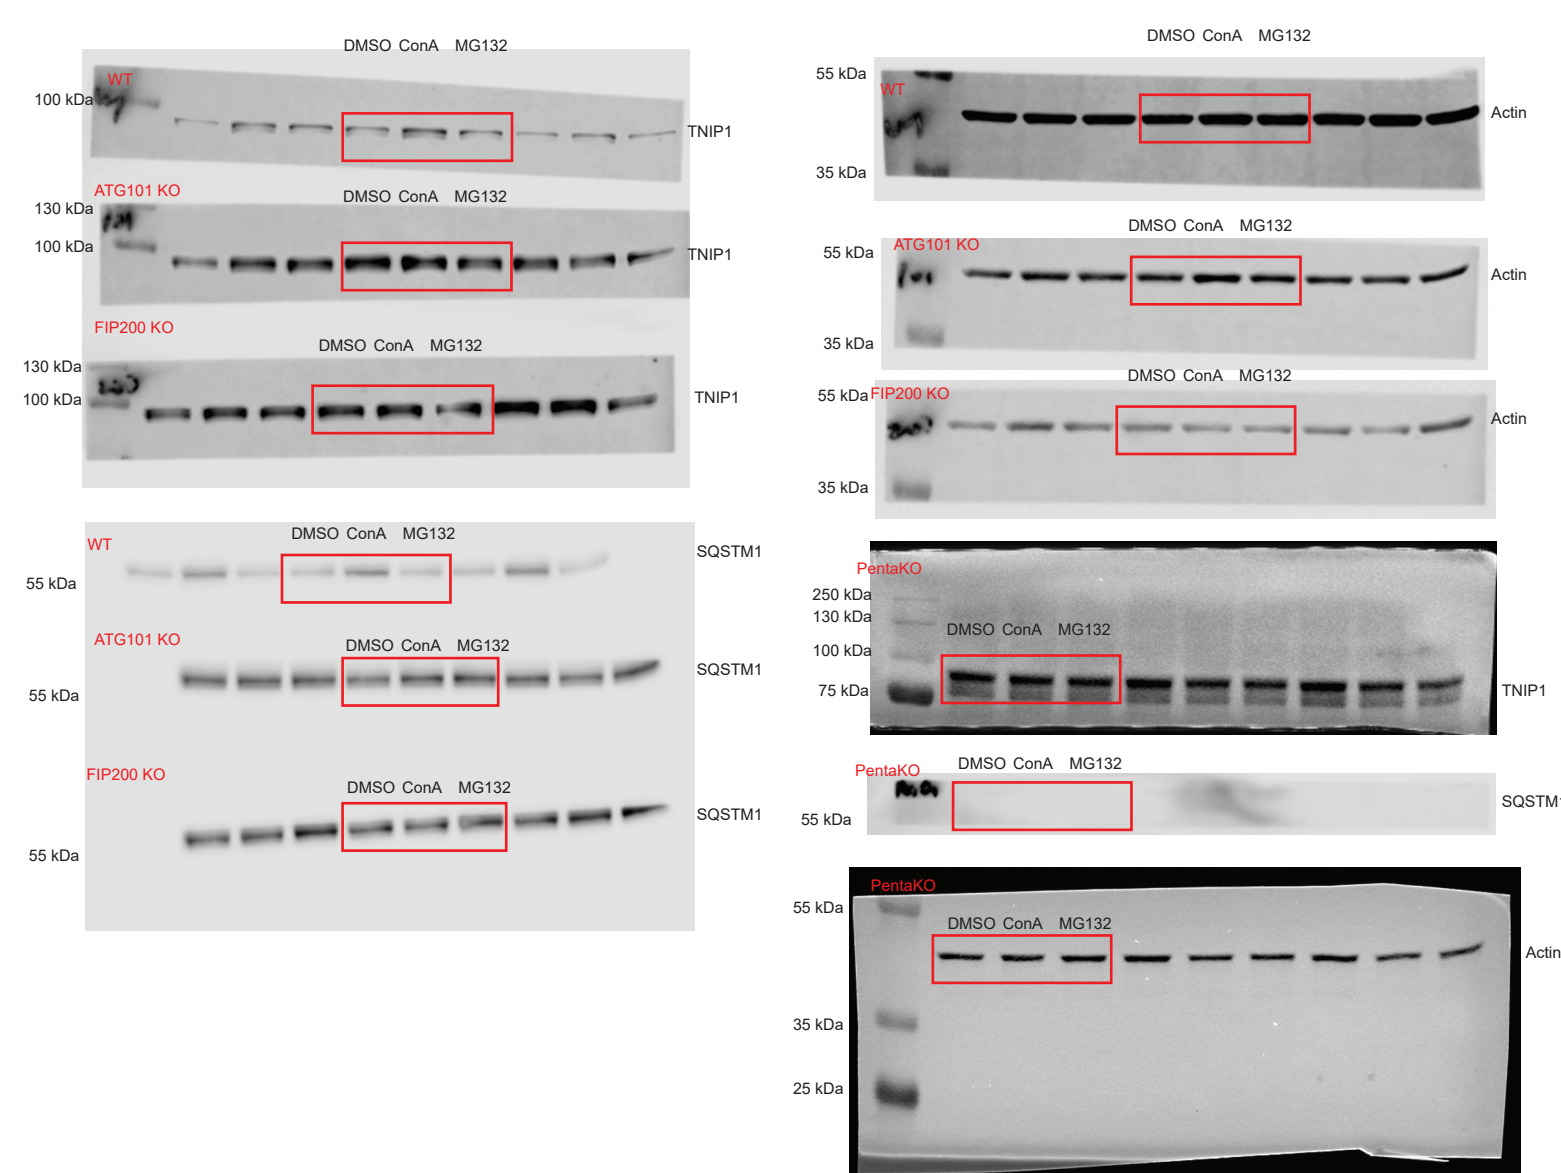

Supplement: JCB_202108144_SourceDataF3.pdf [file JCB_202108144_SourceDataF3.pdf]

Fig4D

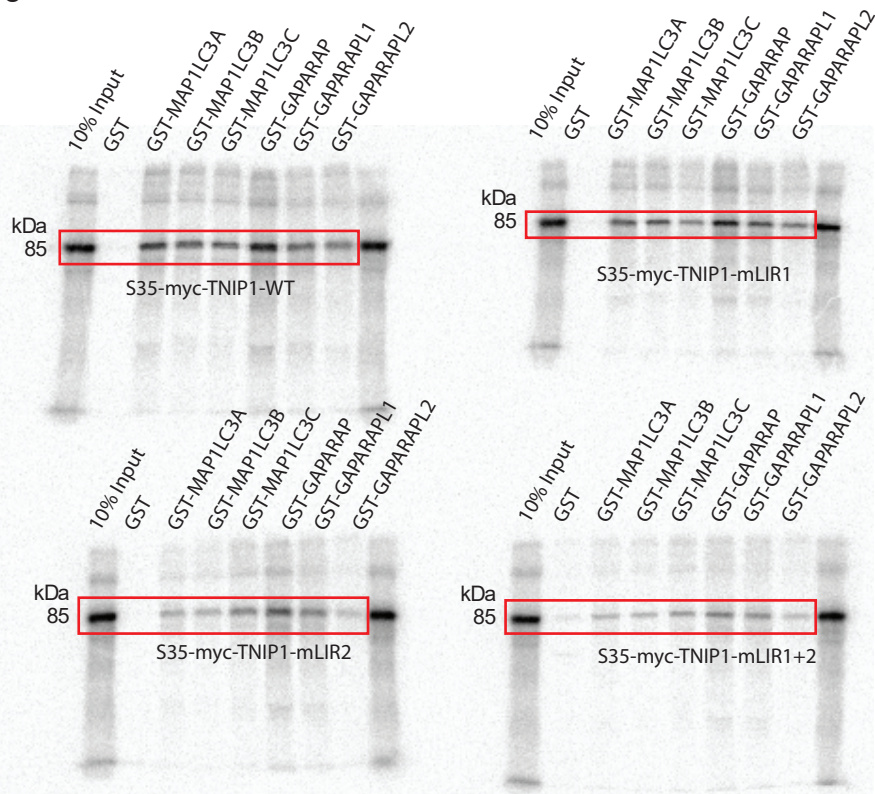

Fig4D

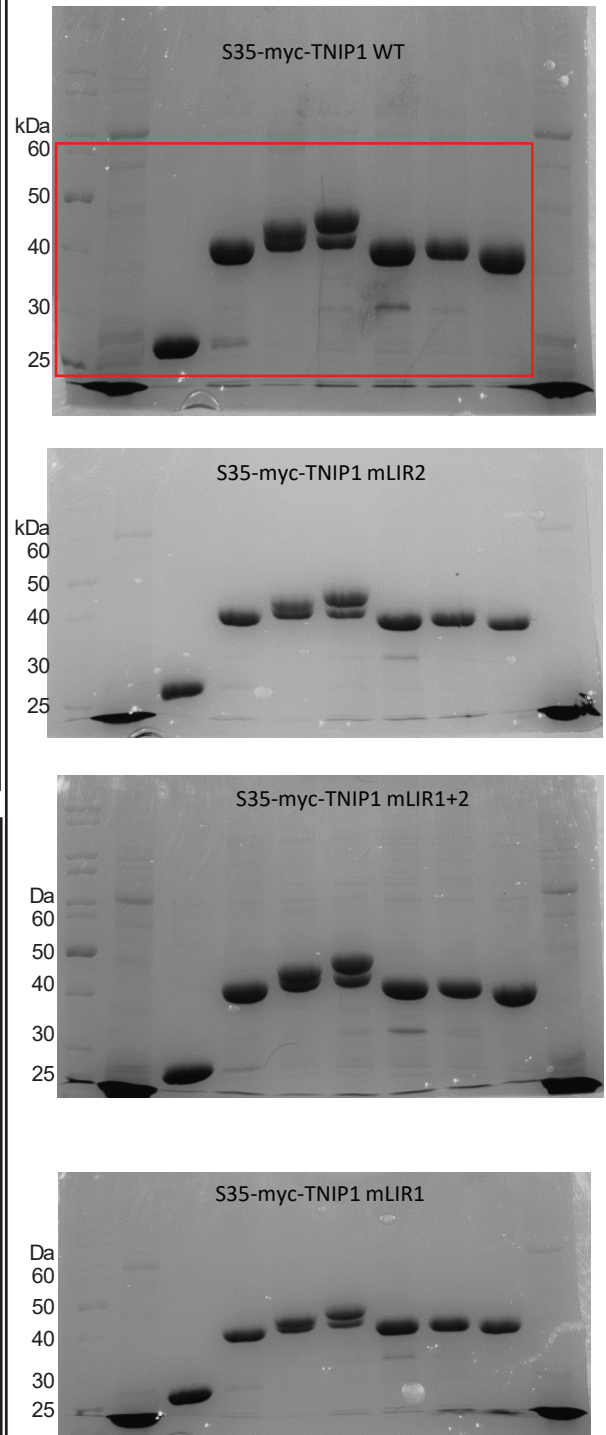

Fig4F

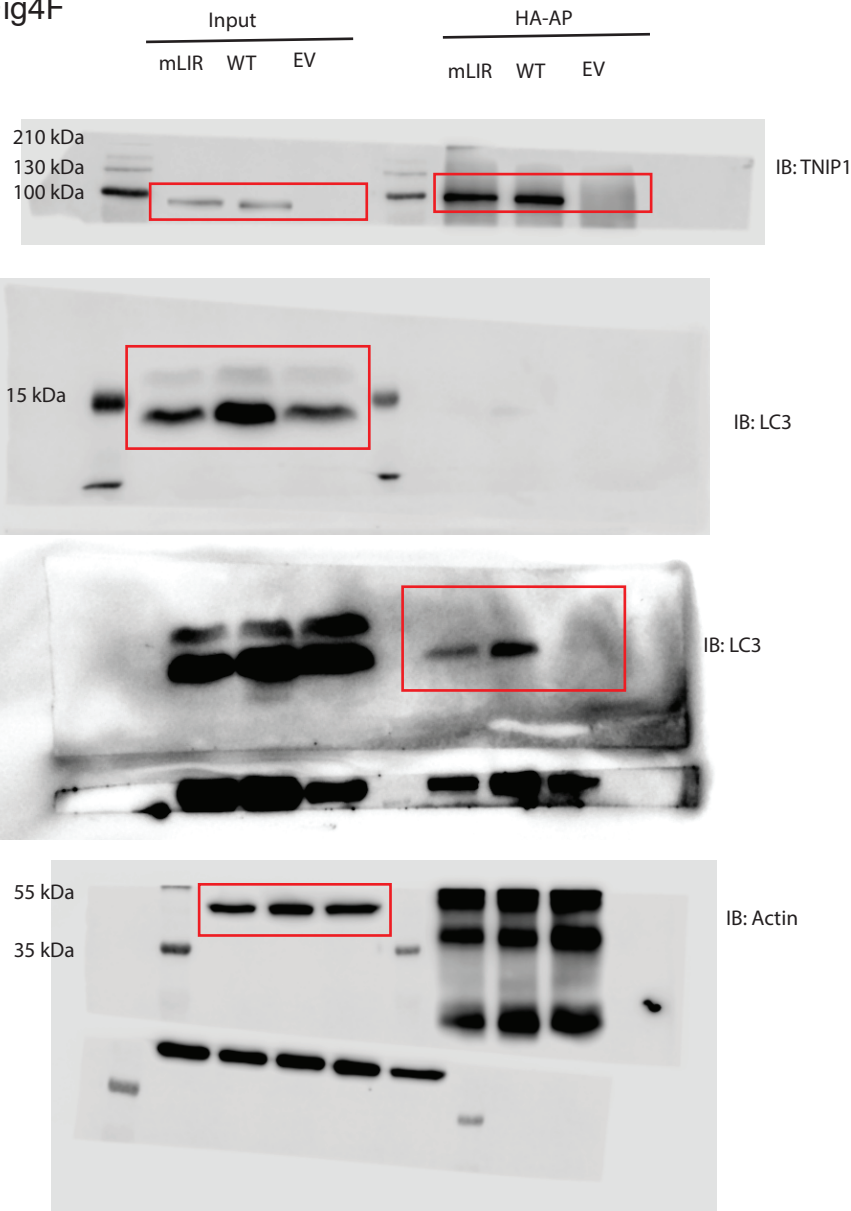

Supplement: JCB_202108144_SourceDataF4.pdf [file JCB_202108144_SourceDataF4.pdf]

Fig5A

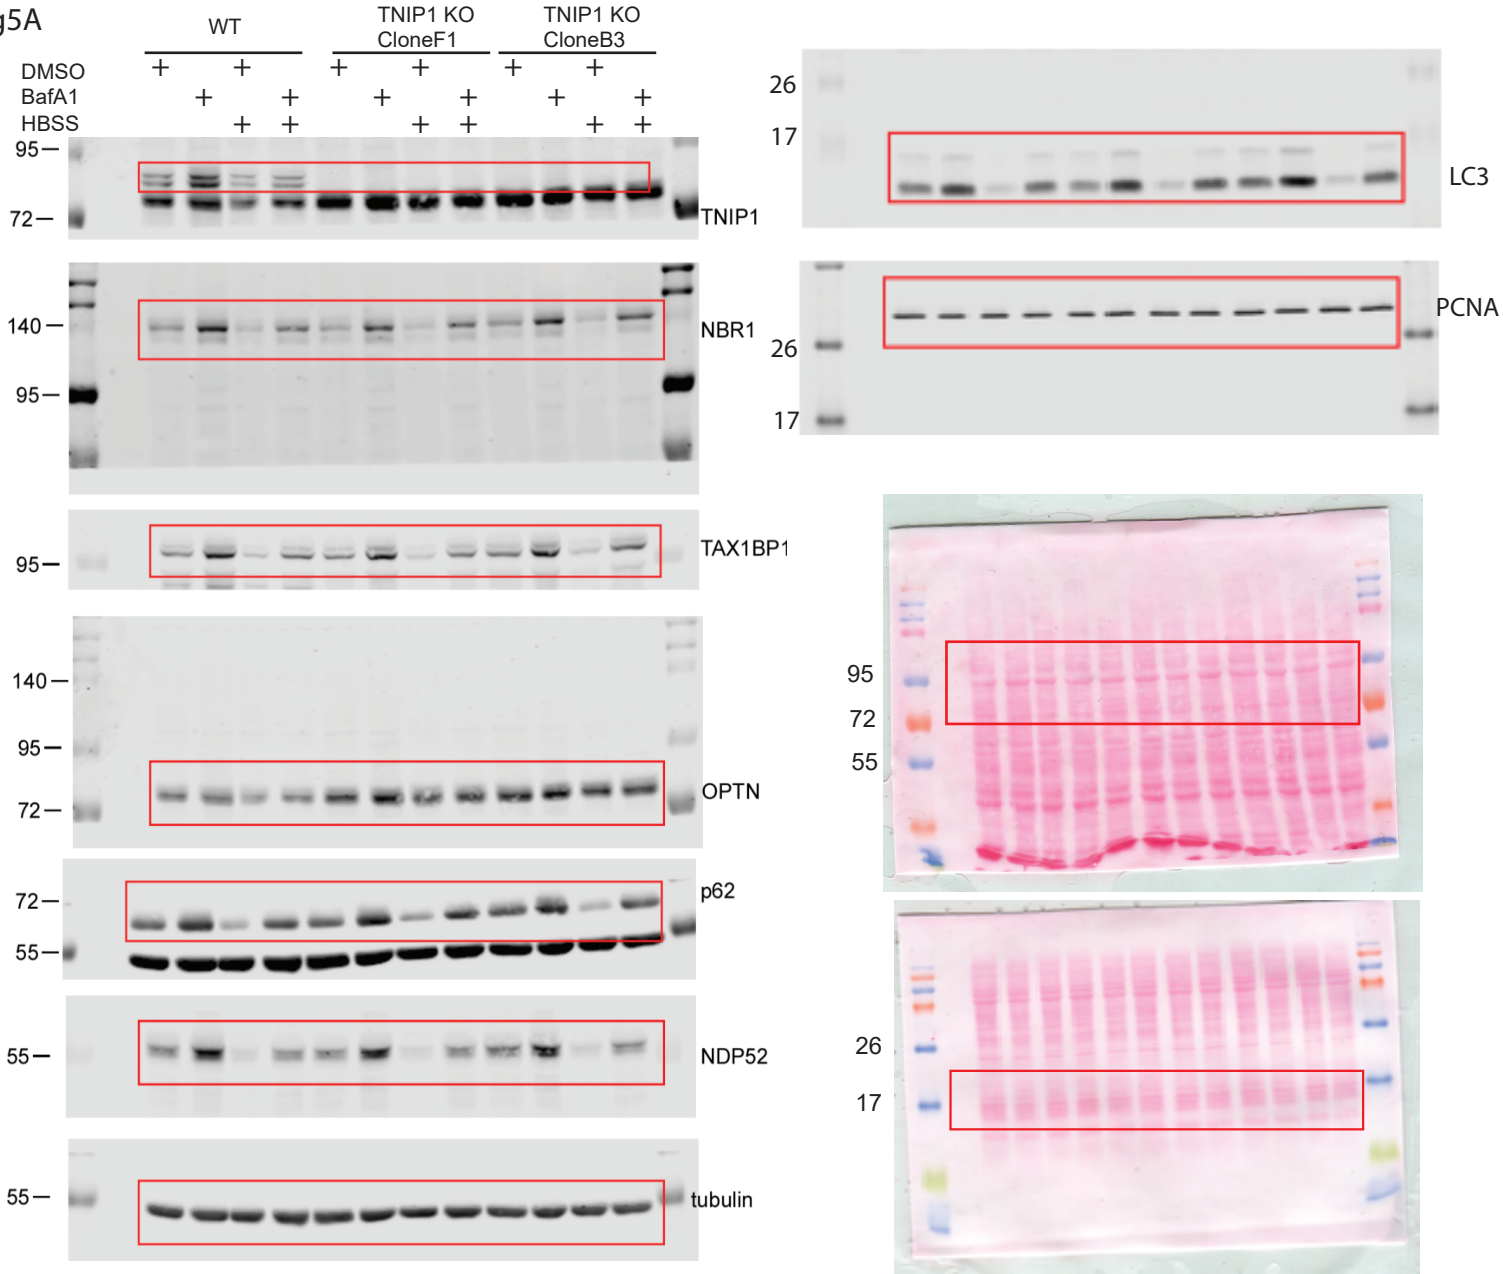

Fig5G

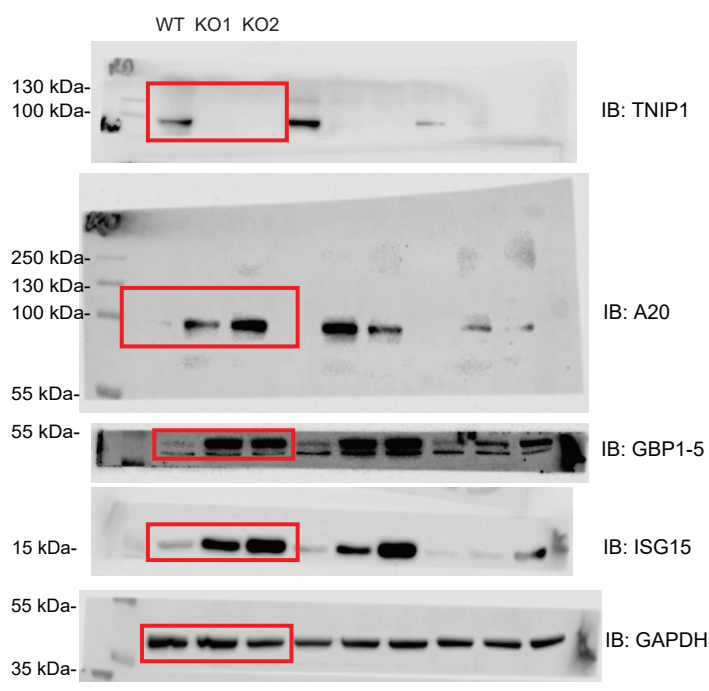

Fig5I

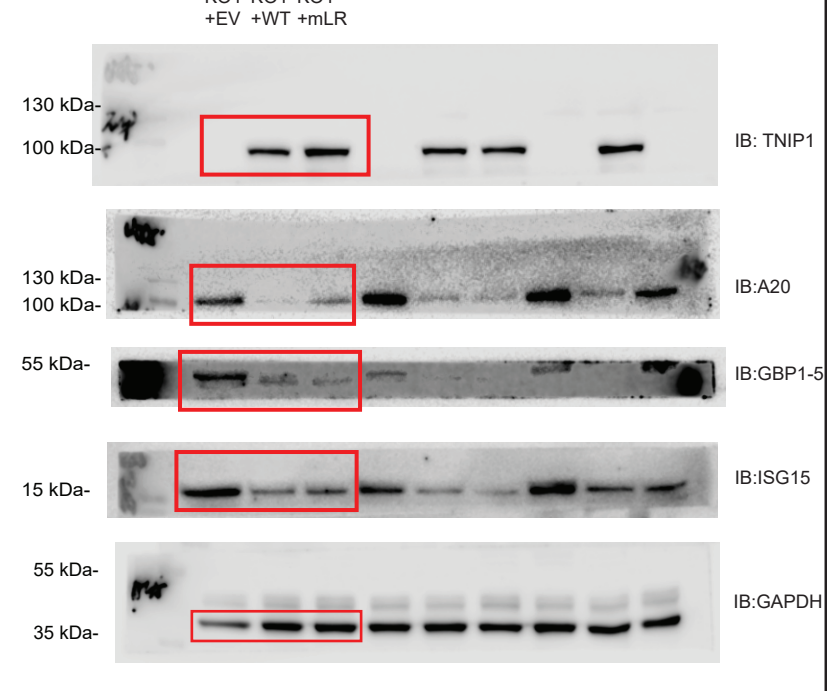

Supplement: JCB_202108144_SourceDataF5.pdf [file JCB_202108144_SourceDataF5.pdf]

Fig6A

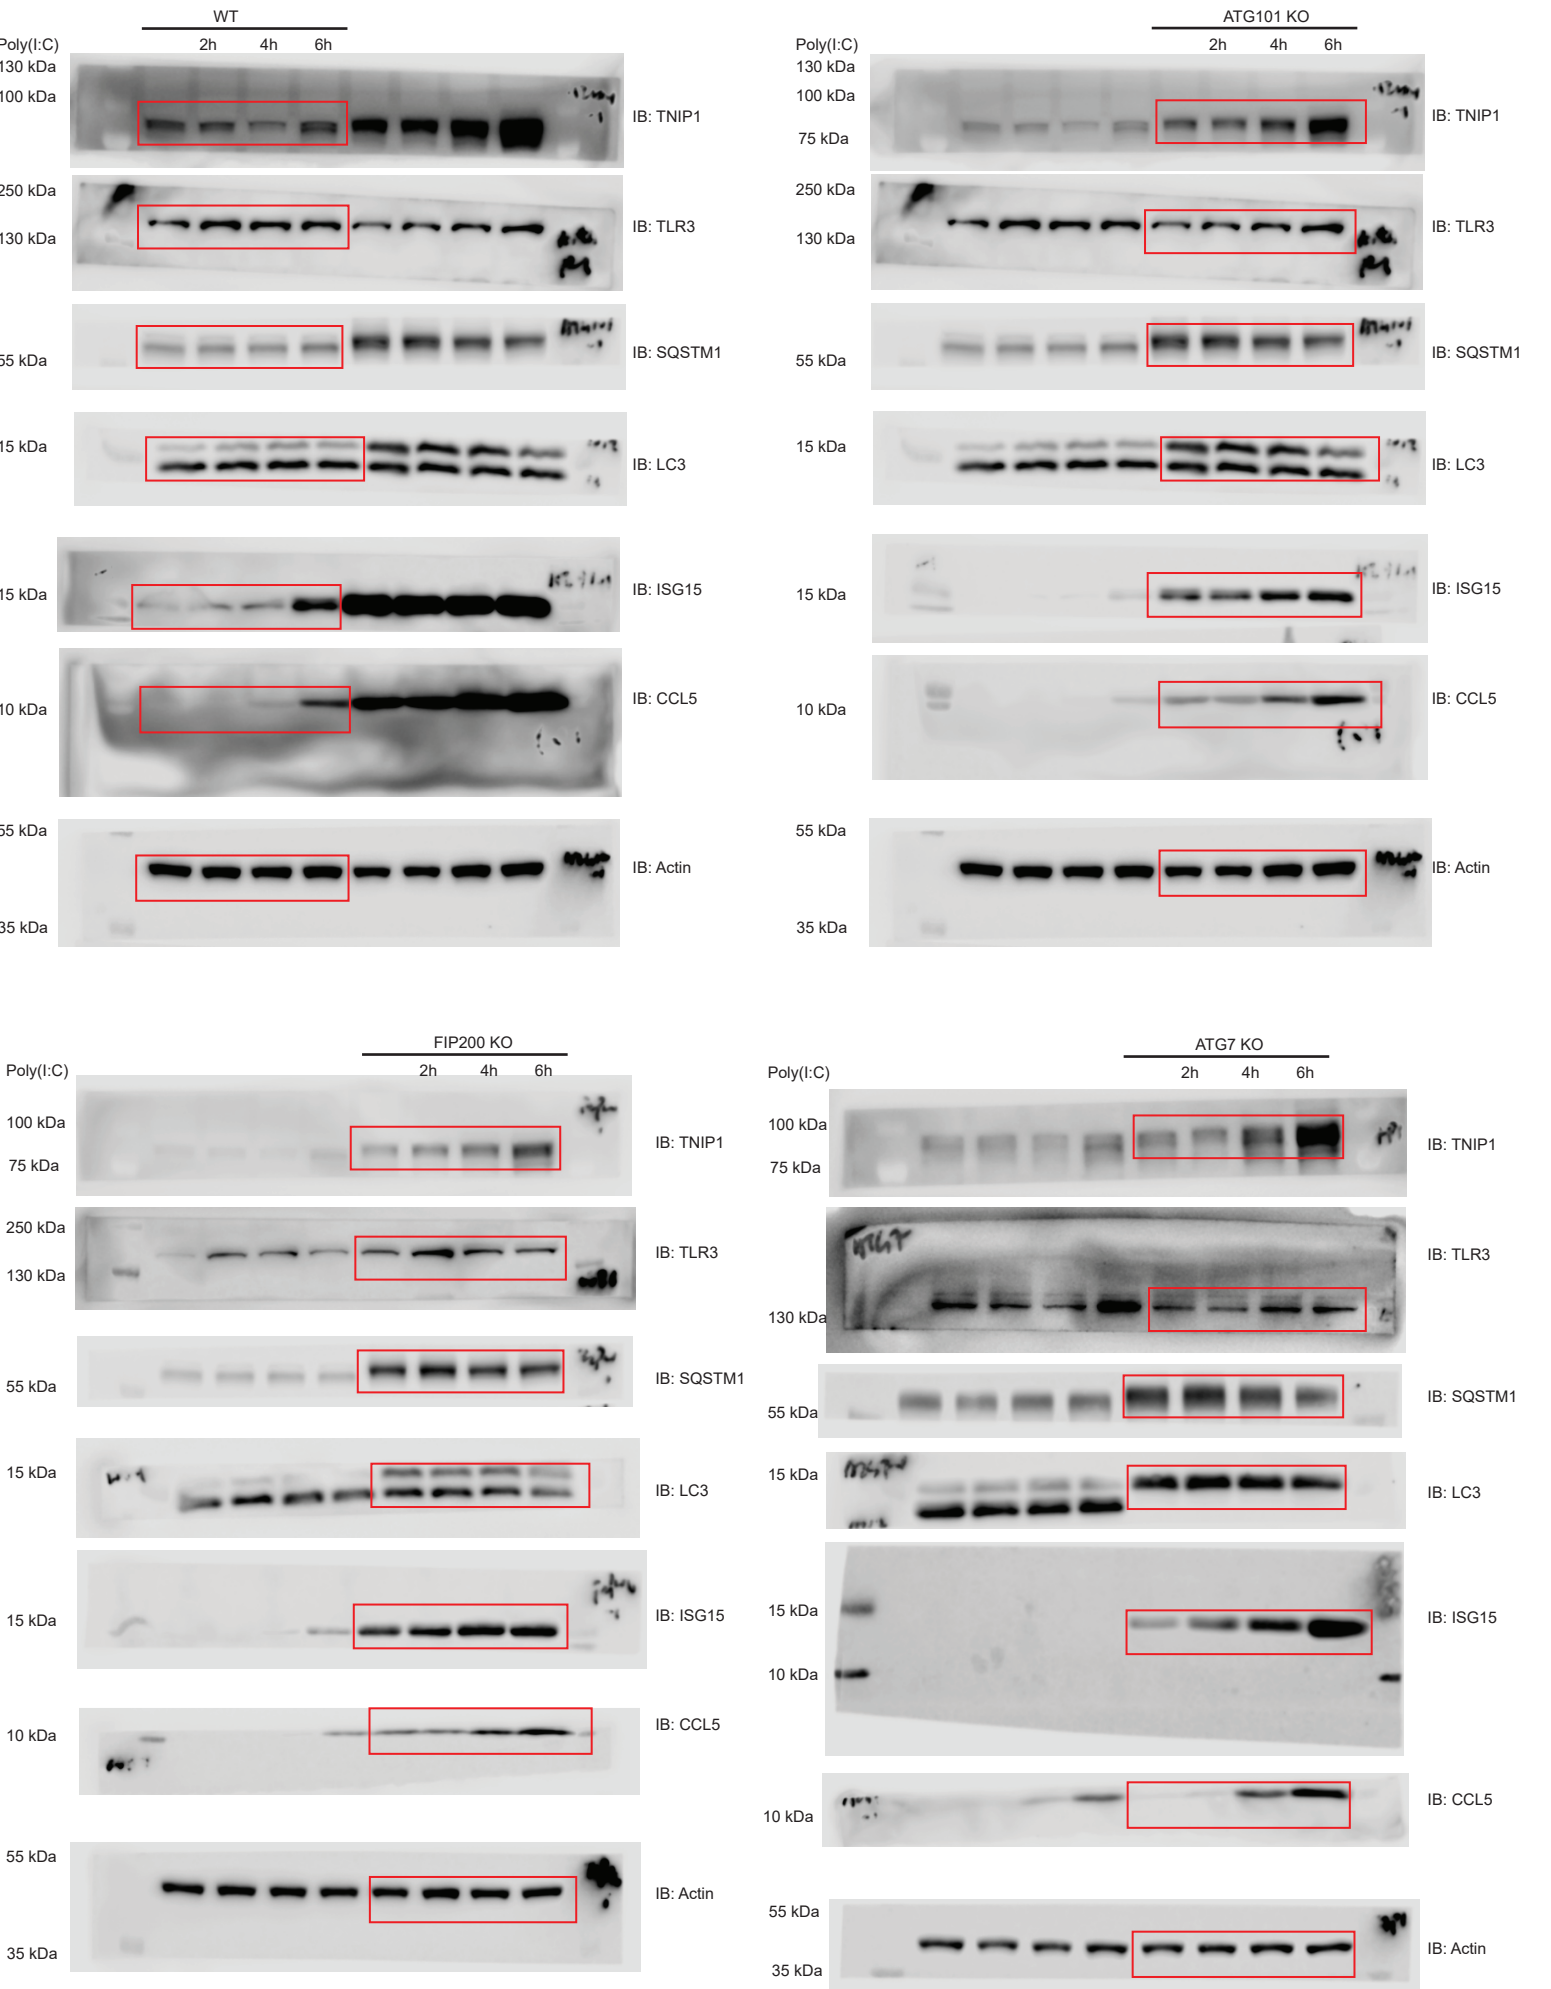

**Fig6A**

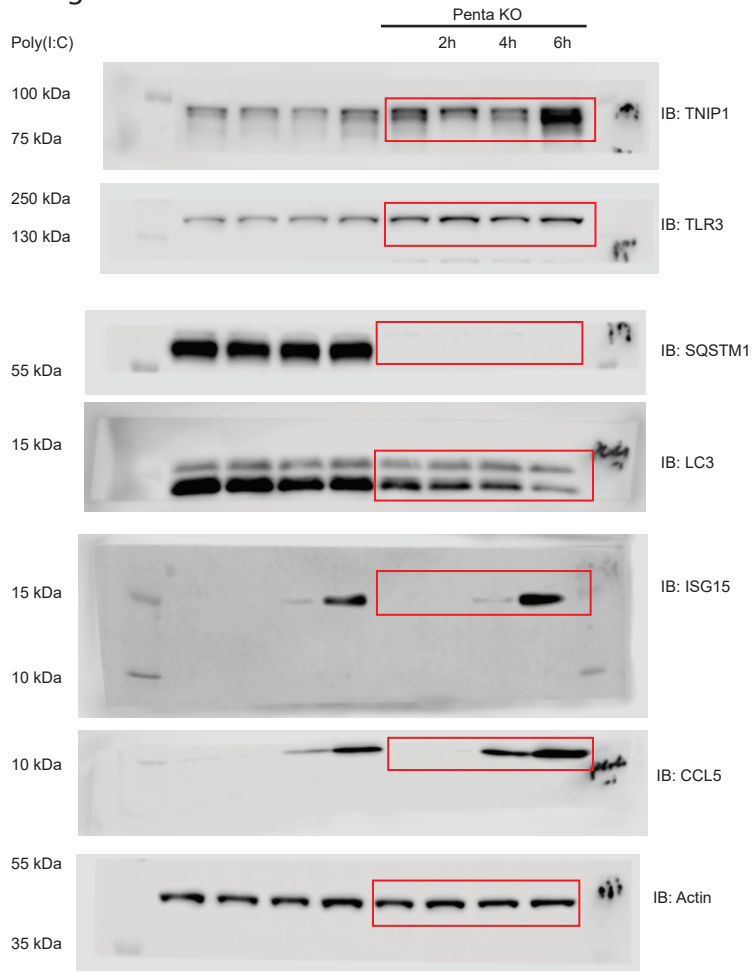

**Fig6H**

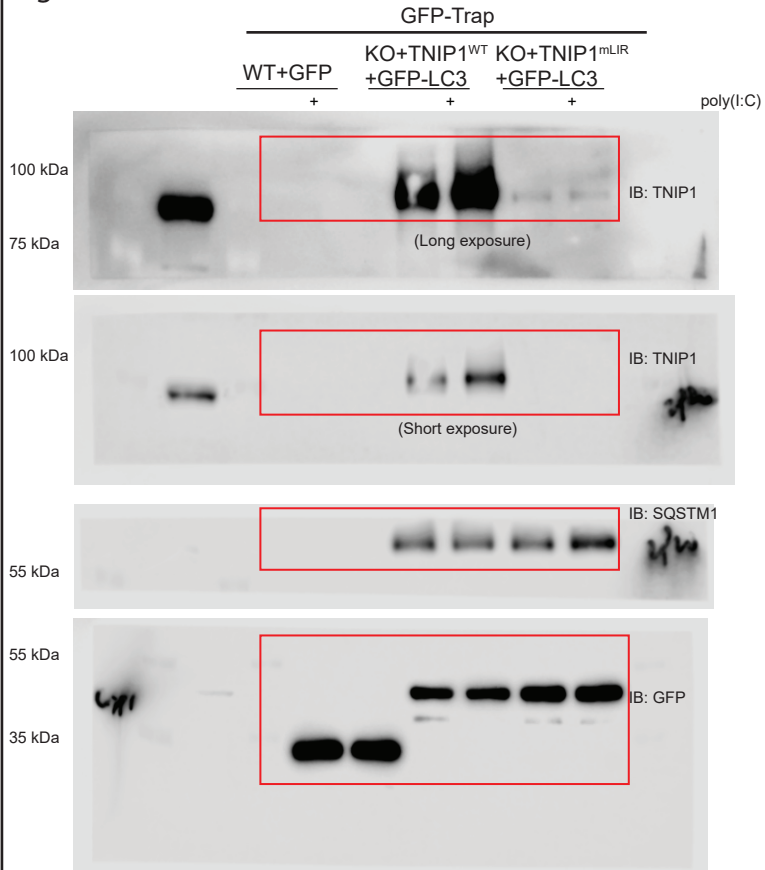

Input

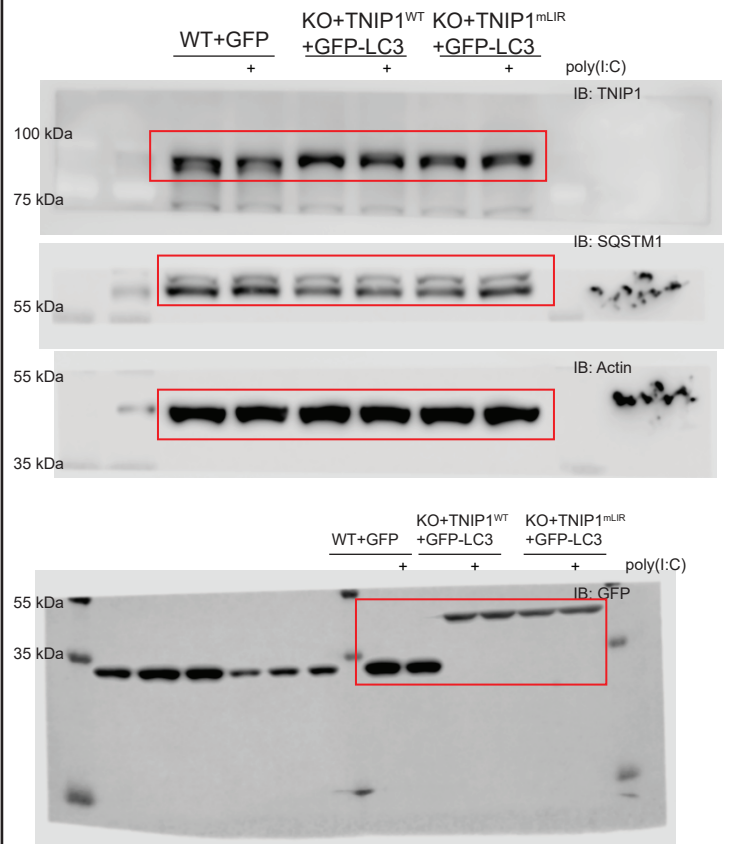

**Fig6F**

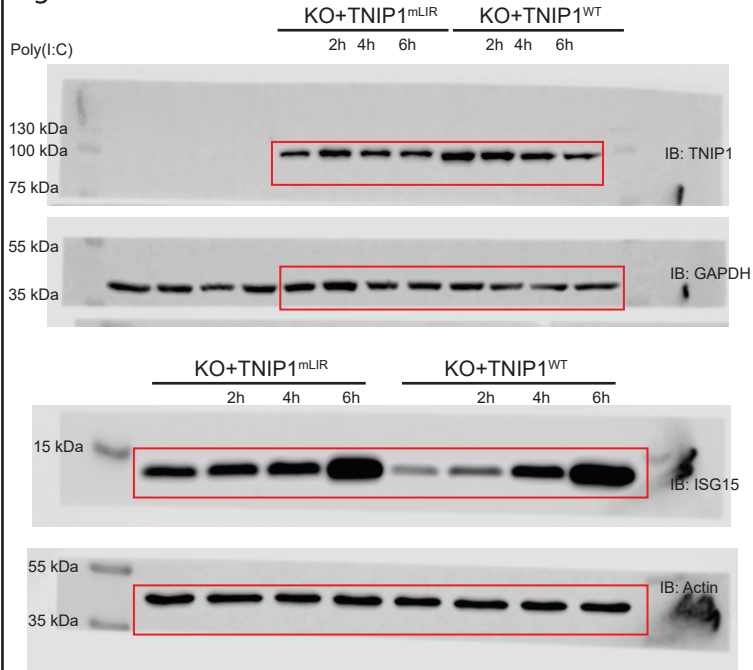

Supplement: JCB_202108144_SourceDataF6.pdf [file JCB_202108144_SourceDataF6.pdf]

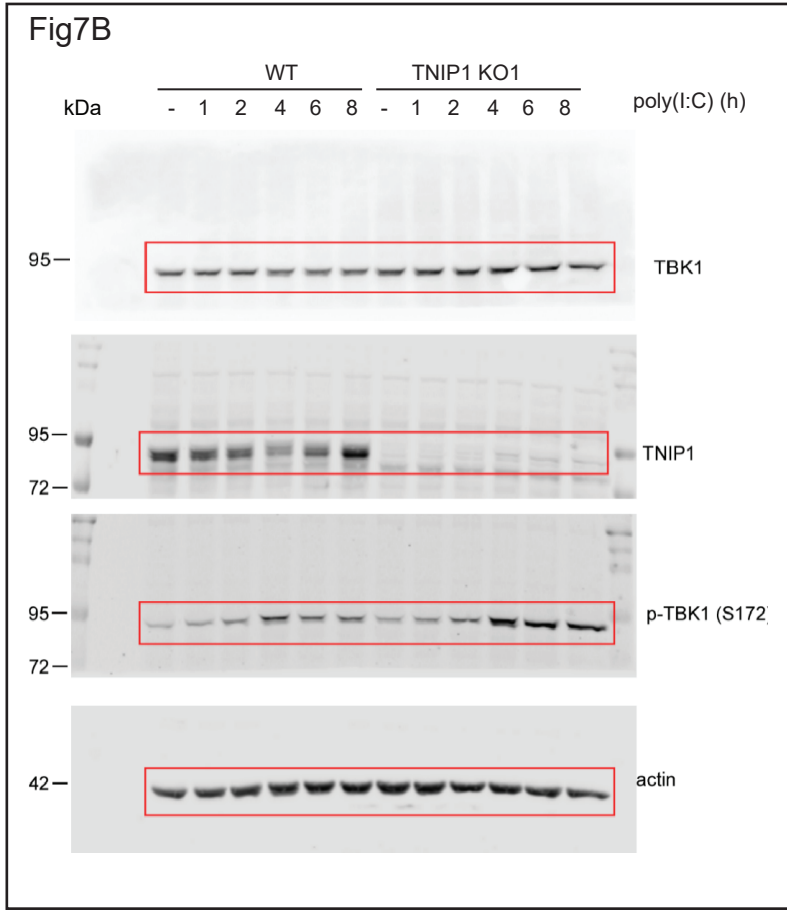

Fig7E

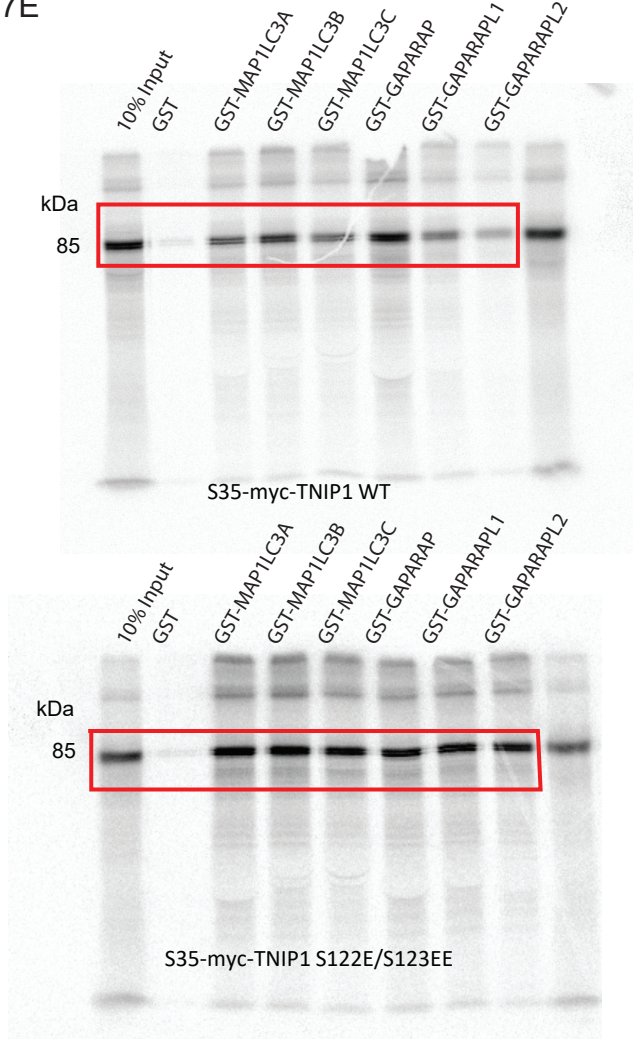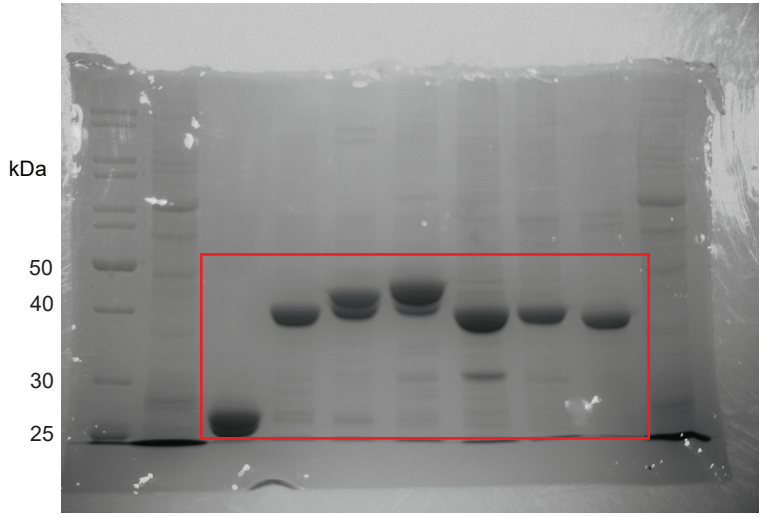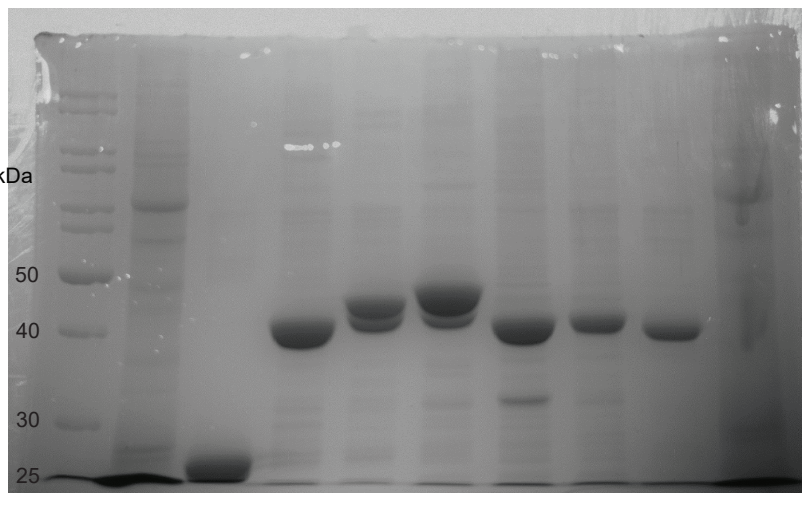

**Fig7F**

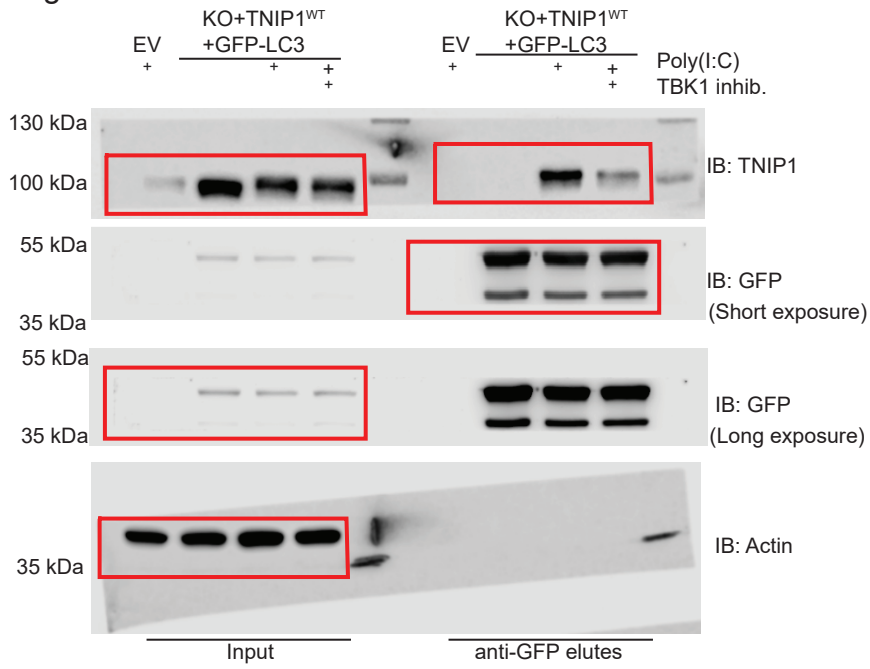

**Fig7G**

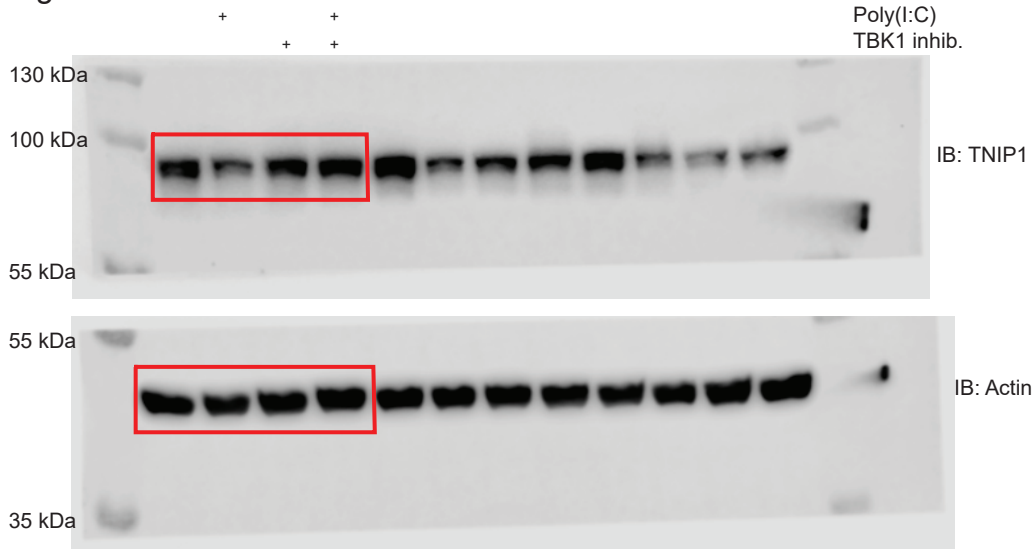

**Fig7H**

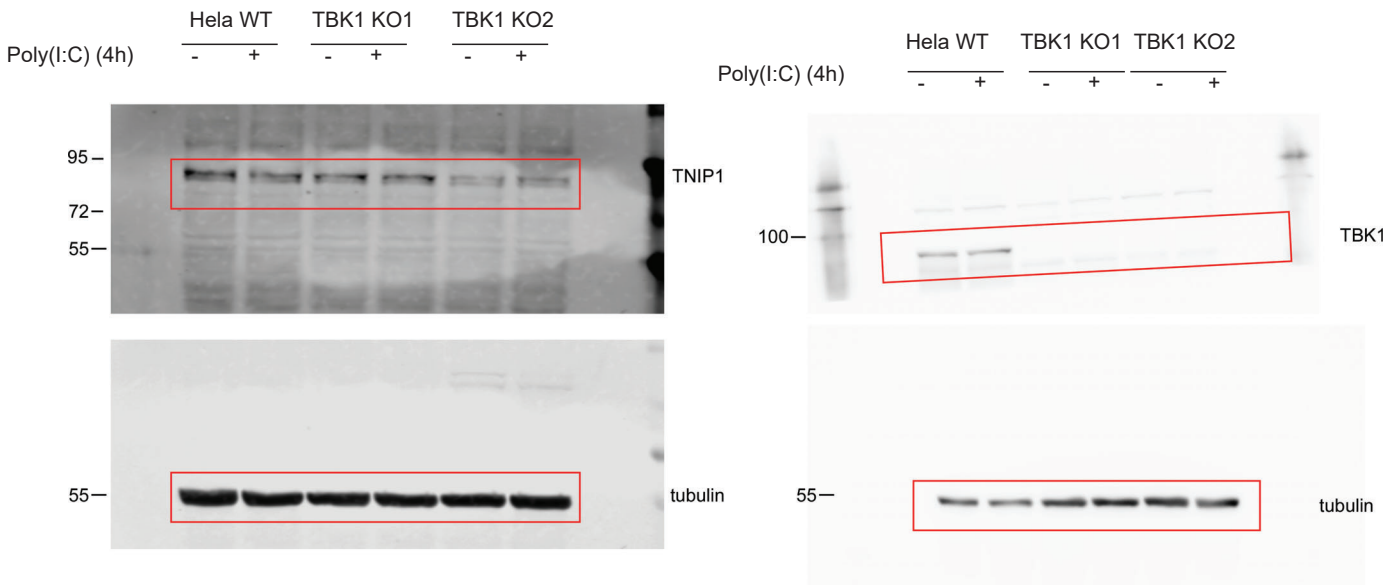

Supplement: JCB_202108144_SourceDataF7.pdf [file JCB_202108144_SourceDataF7.pdf]

FigS1A

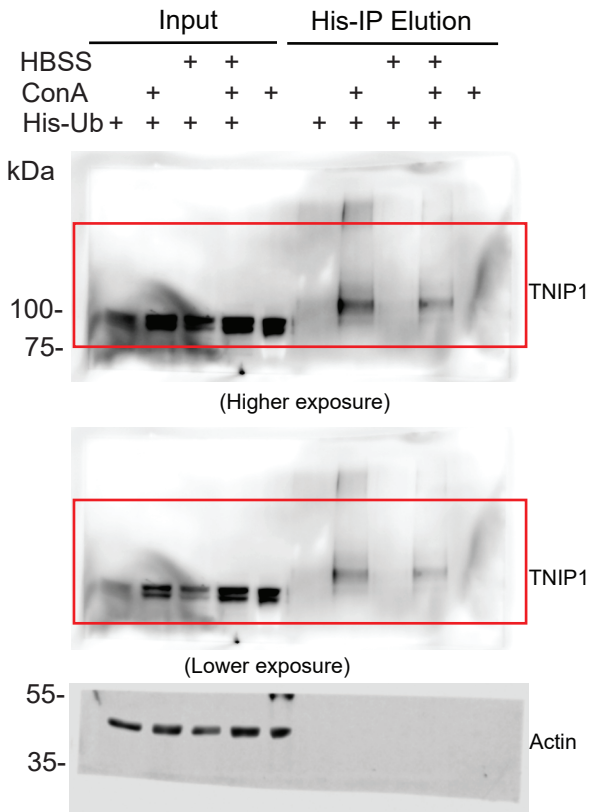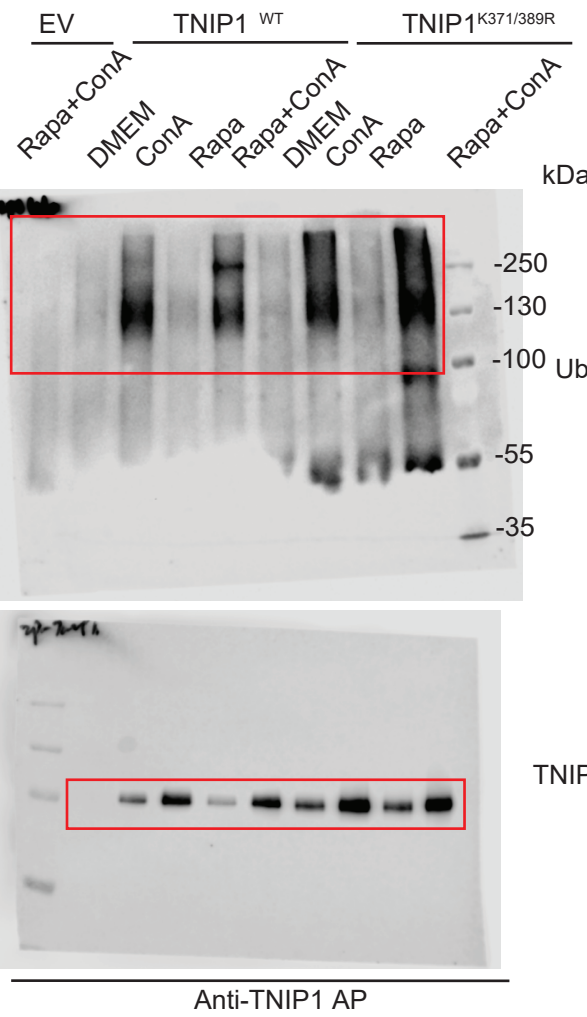

FigS1B

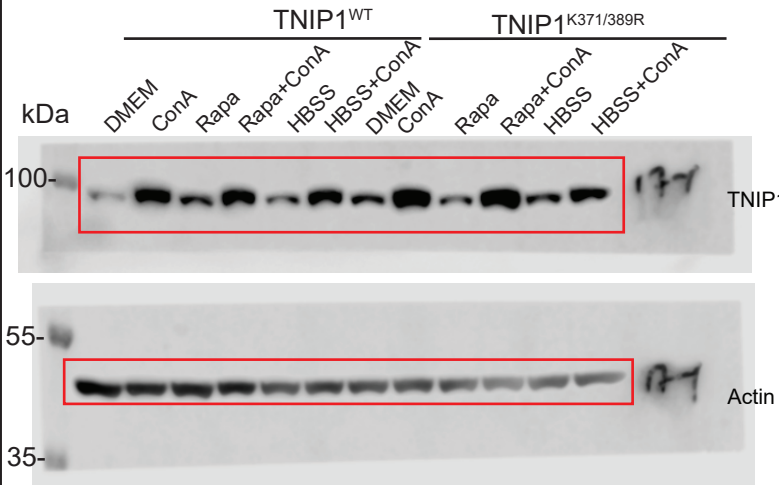

FigS1E

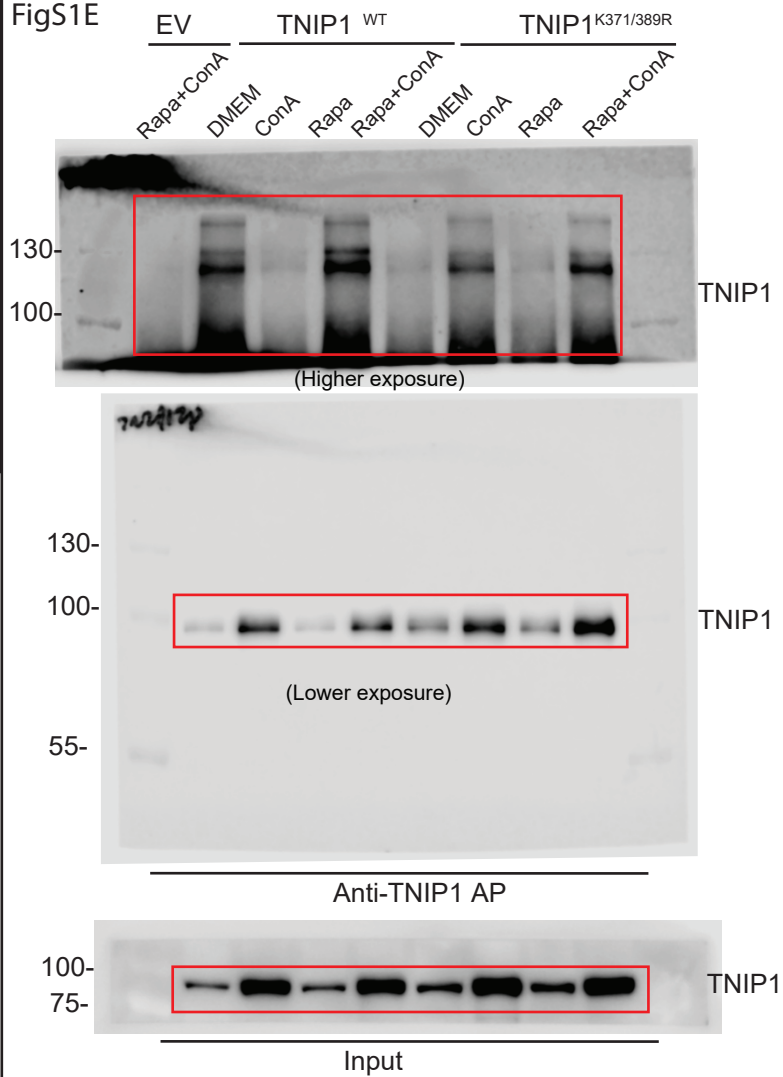

Supplement: JCB_202108144_SourceDataFS1.pdf [file JCB_202108144_SourceDataFS1.pdf]

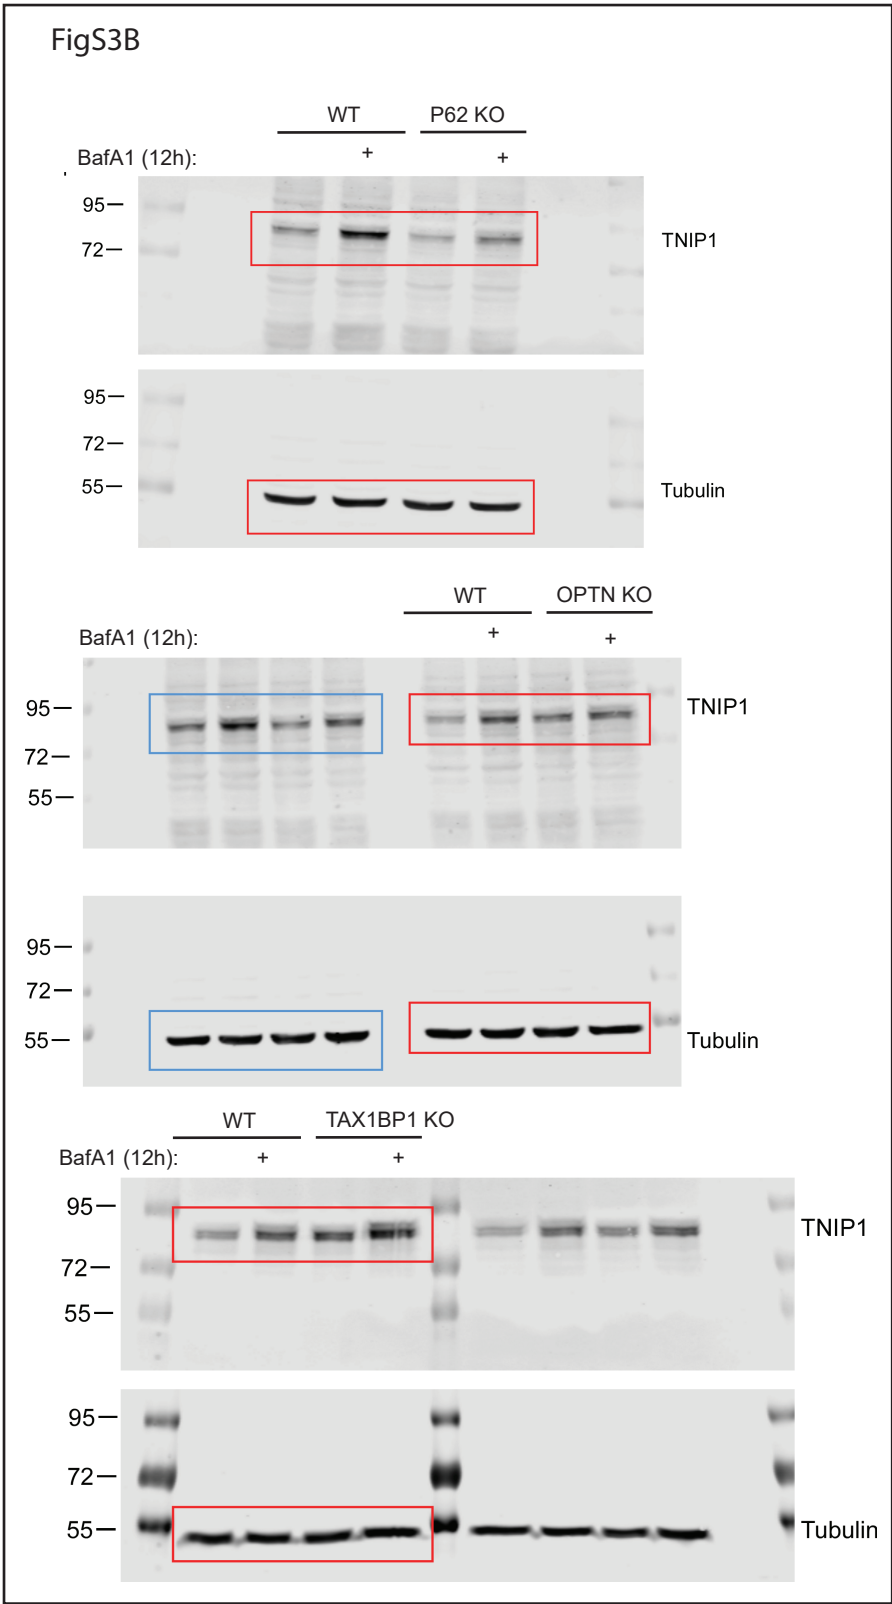

FigS3C

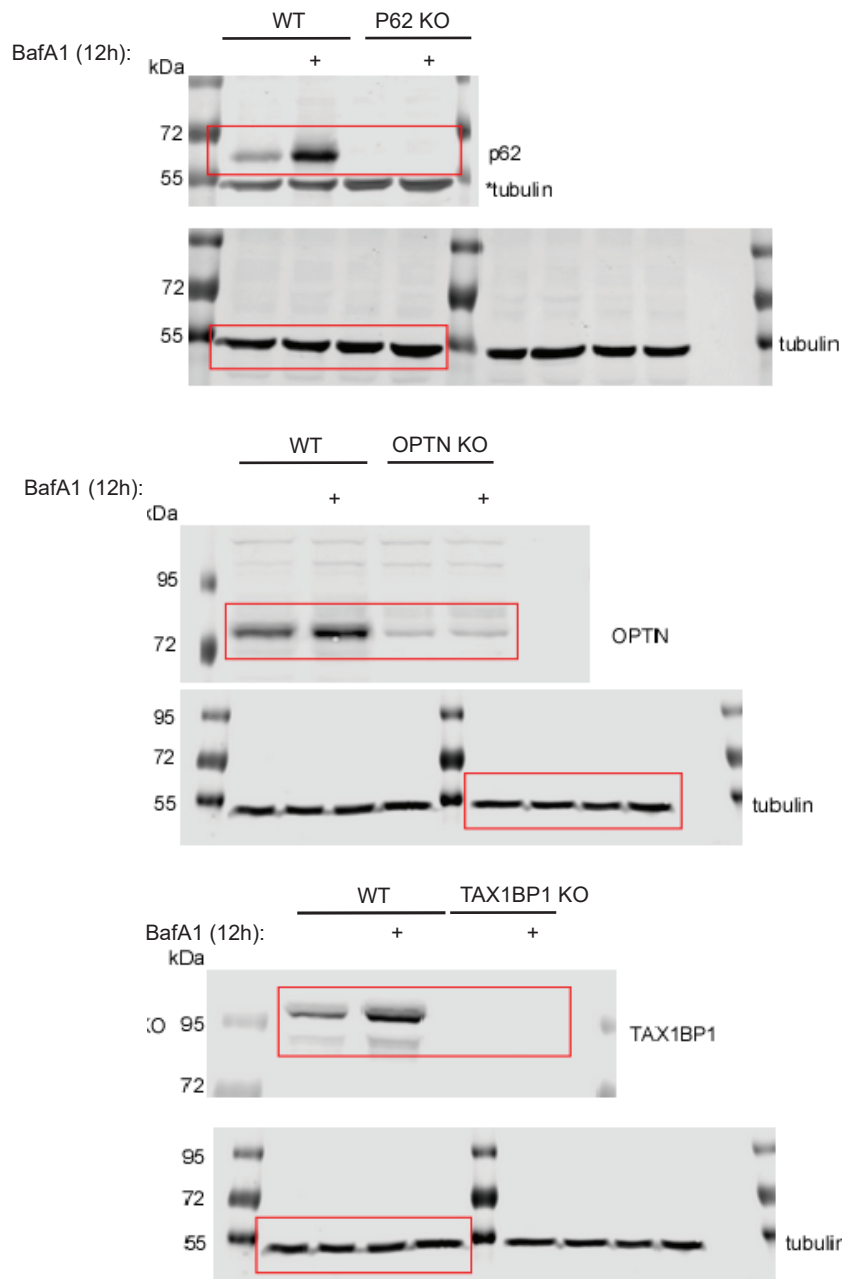

Supplement: JCB_202108144_SourceDataFS3.pdf [file JCB_202108144_SourceDataFS3.pdf]

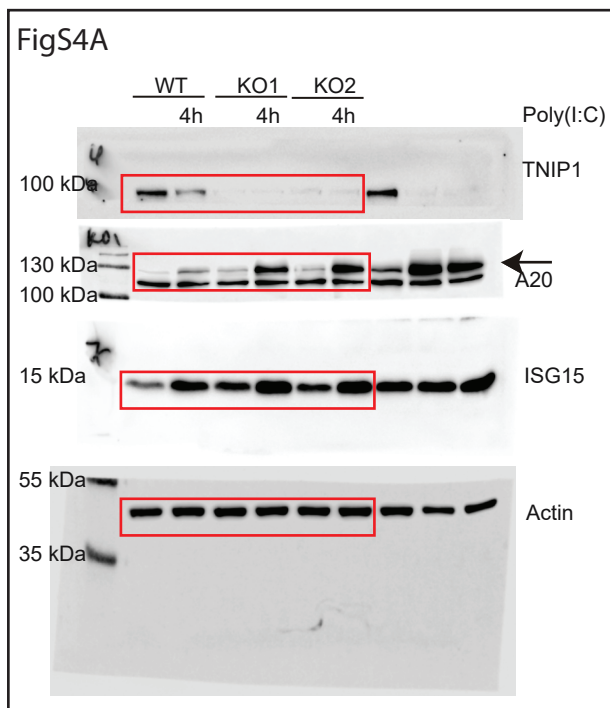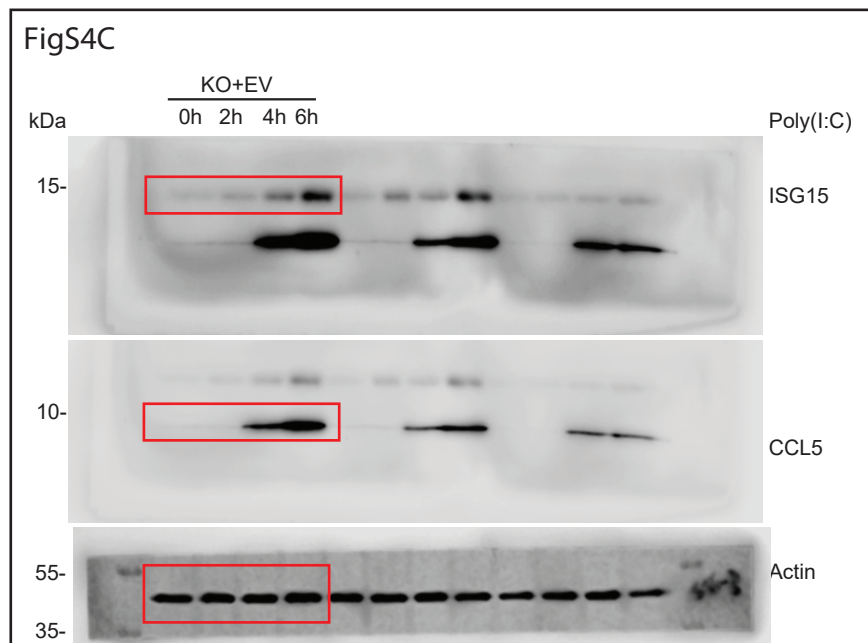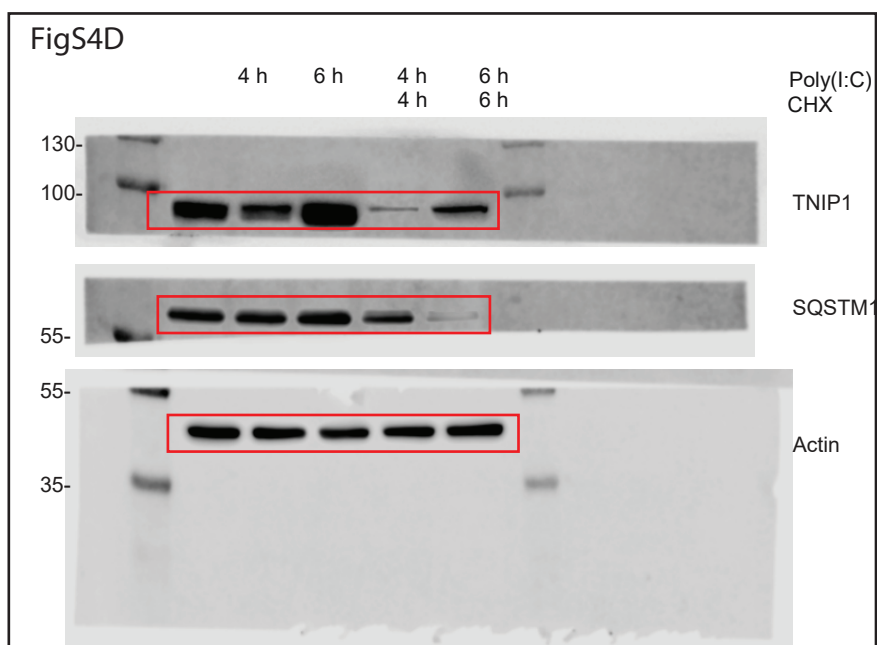

FigS4B

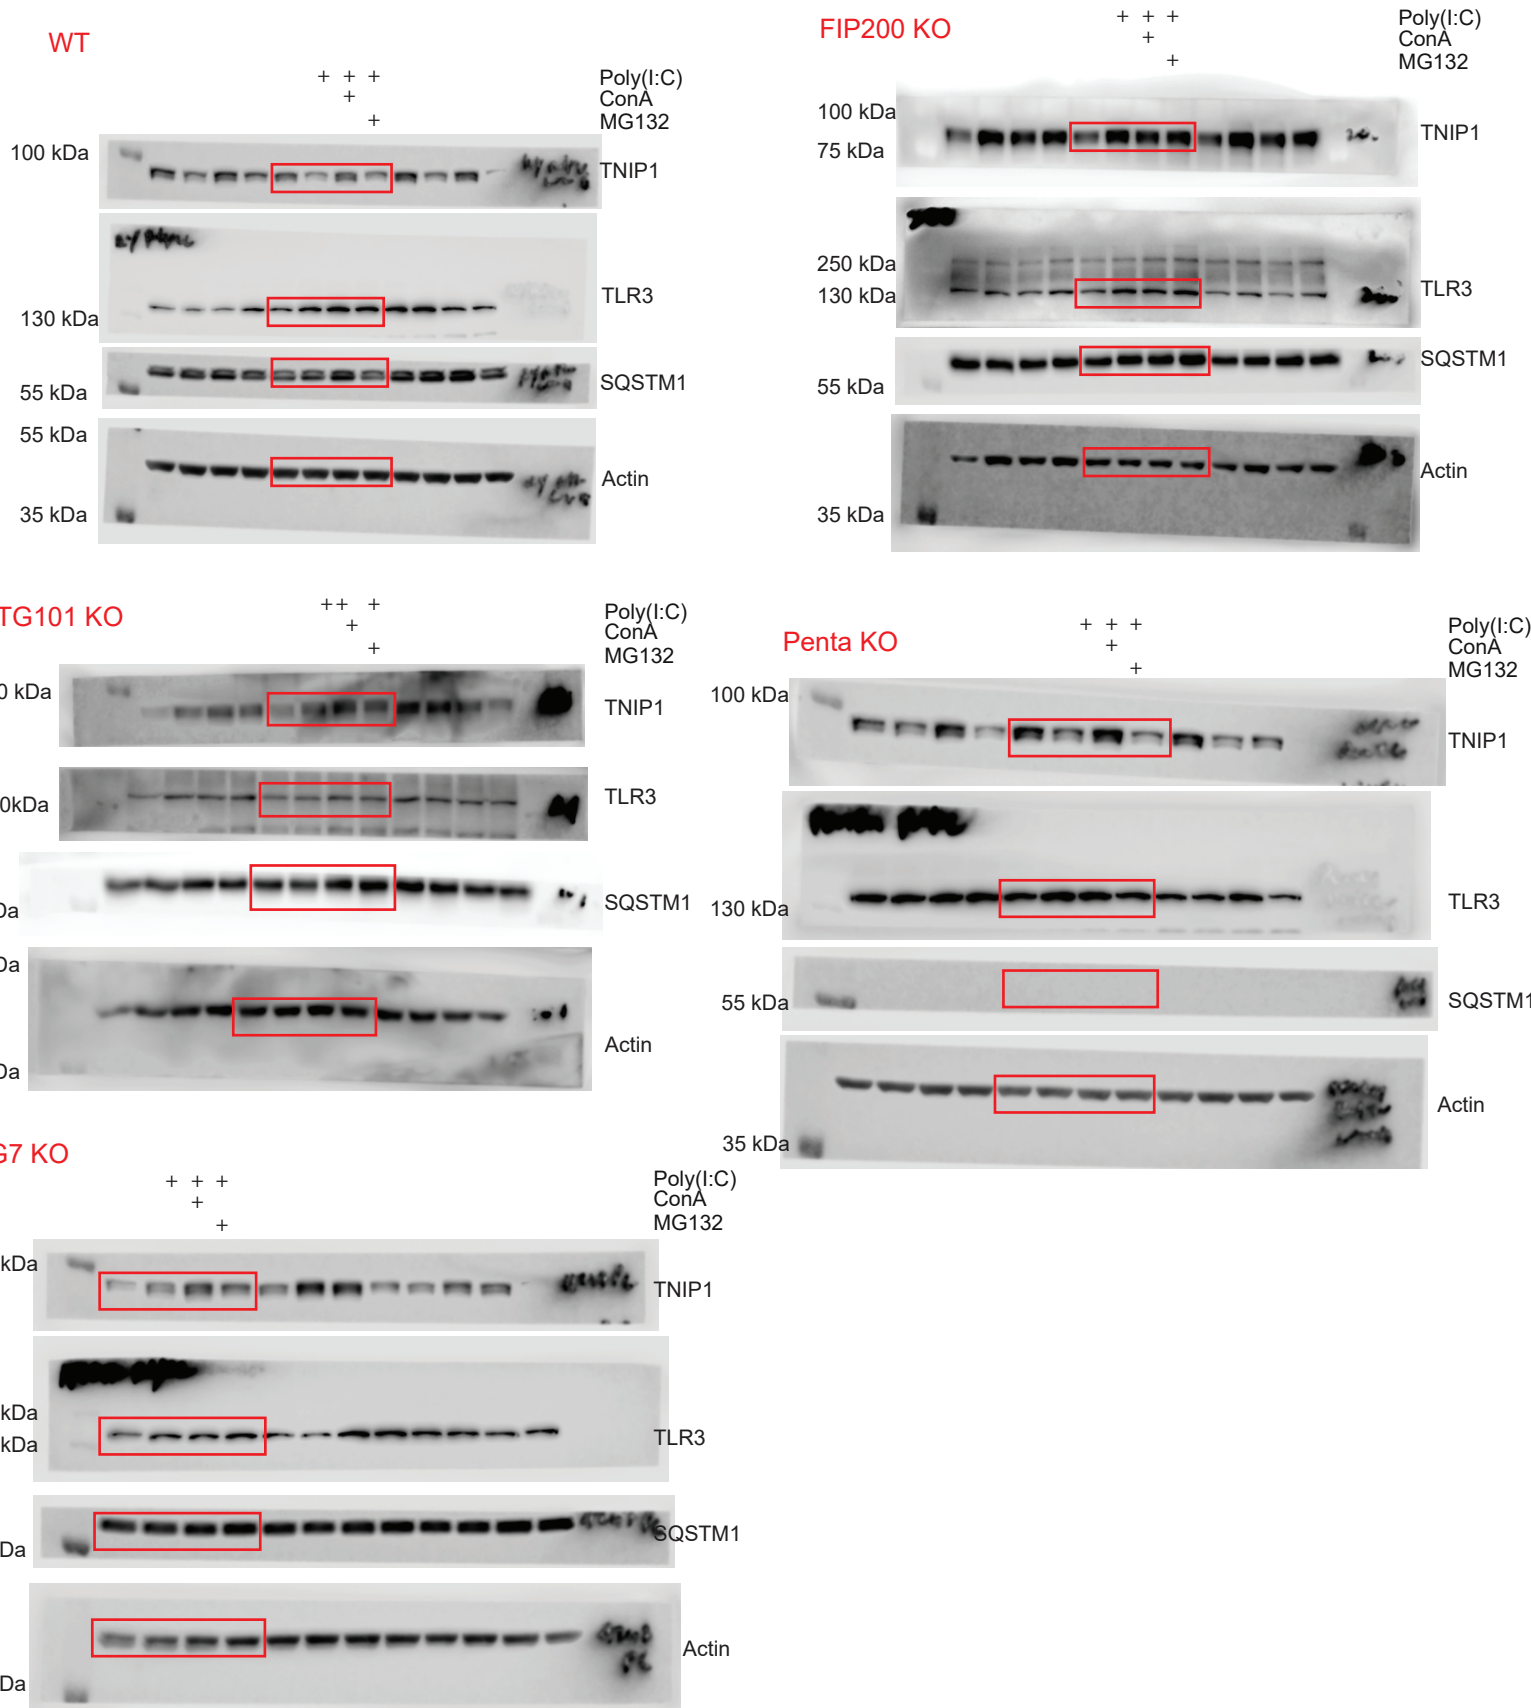

Supplement: JCB_202108144_SourceDataFS4.pdf [file JCB_202108144_SourceDataFS4.pdf]
